# Supplementary material for: In vivo biocompatibility of ZIF-8 for slow release via intranasal administration
Source: Royal Society of Chemistry journal article supplement (doi:10.1039/d3sc00500c), 2023-01-01
Supplement: d3sc00500c1.pdf [file d3sc00500c1.pdf]

## Supplementary Information

### In Vivo Biocompatibility of ZIF-8 for Slow Release via Intranasal Administration

*Sneha Kumari,<sup>1\*</sup> Thomas S. Howlett,<sup>1</sup> Rynne N. Ehrman,<sup>1</sup> Shailendra Koirala,<sup>1</sup> Orikeda Trashi,<sup>1</sup> Ikeda Trashi,<sup>1</sup> Yalini H. Wijesundara,<sup>1</sup> Jeremiah J. Gassensmith<sup>1,2\*</sup>*

Figure S1

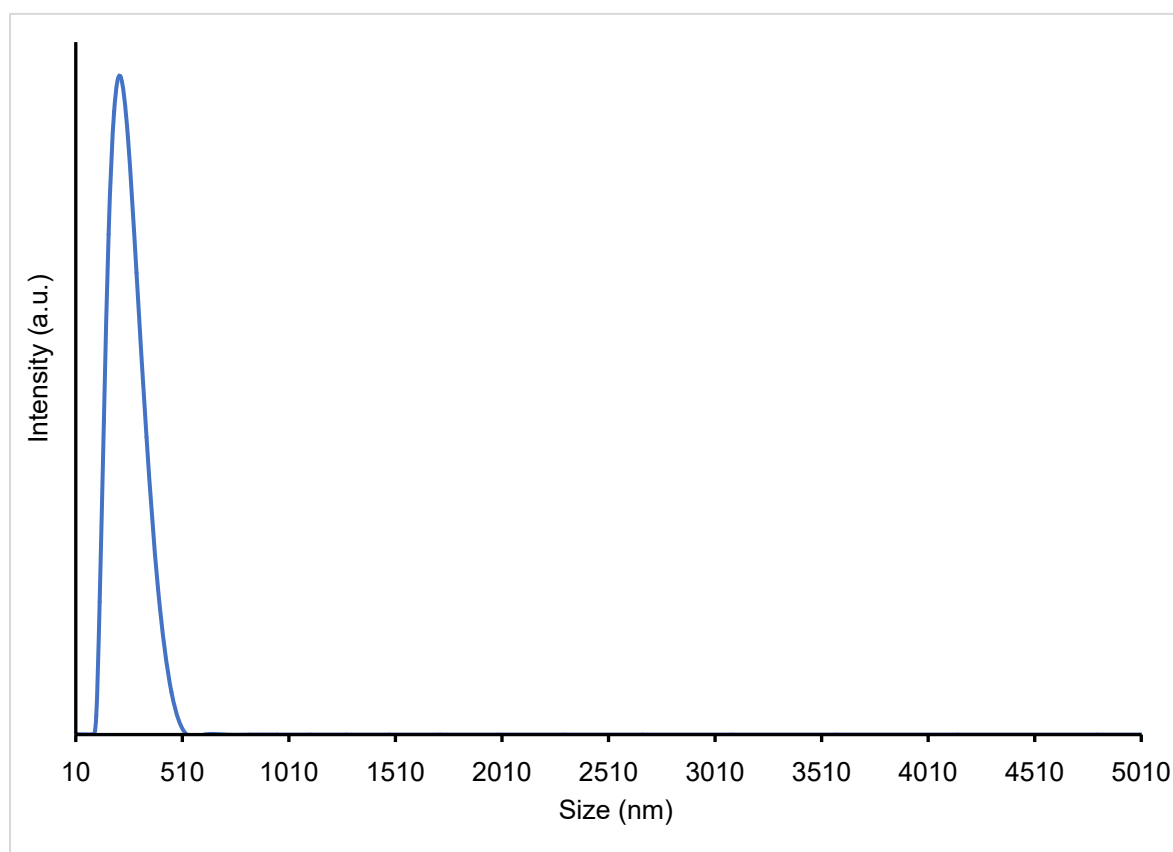

Fig S1: Size characterization of liposomes (Lip) through dynamic light scattering (Average: 218.7 nm, PDI: 0.142)

**Figure S2**

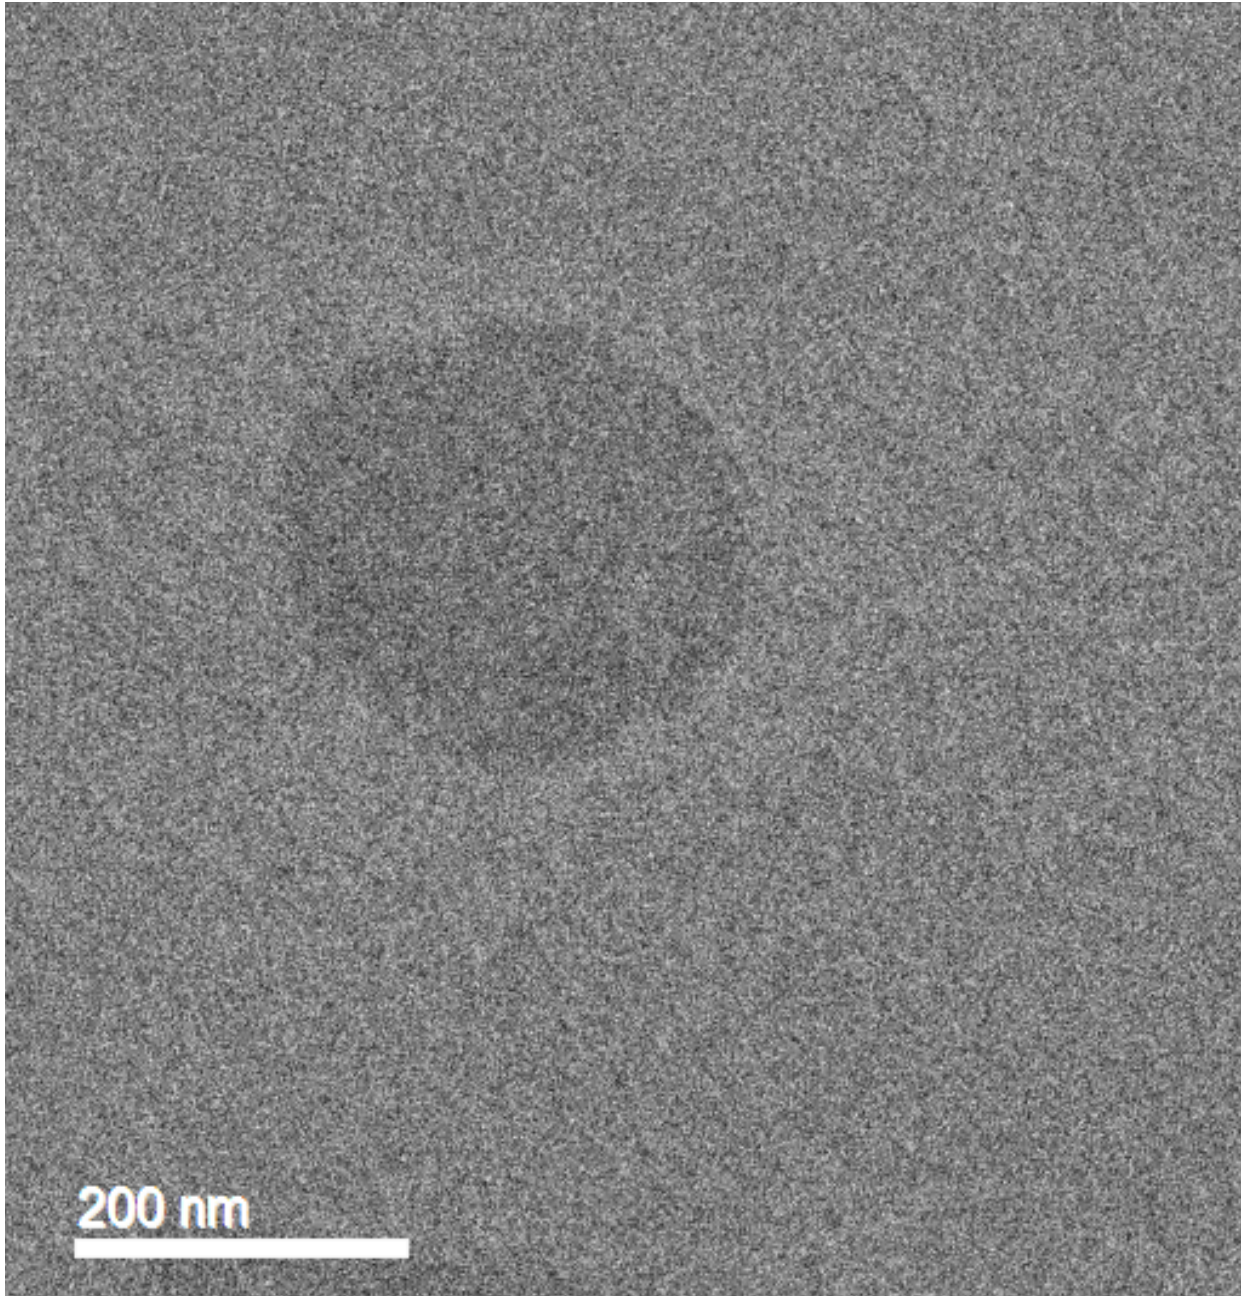

Fig S2: Transmission electron micrograph of Lip

Figure S3

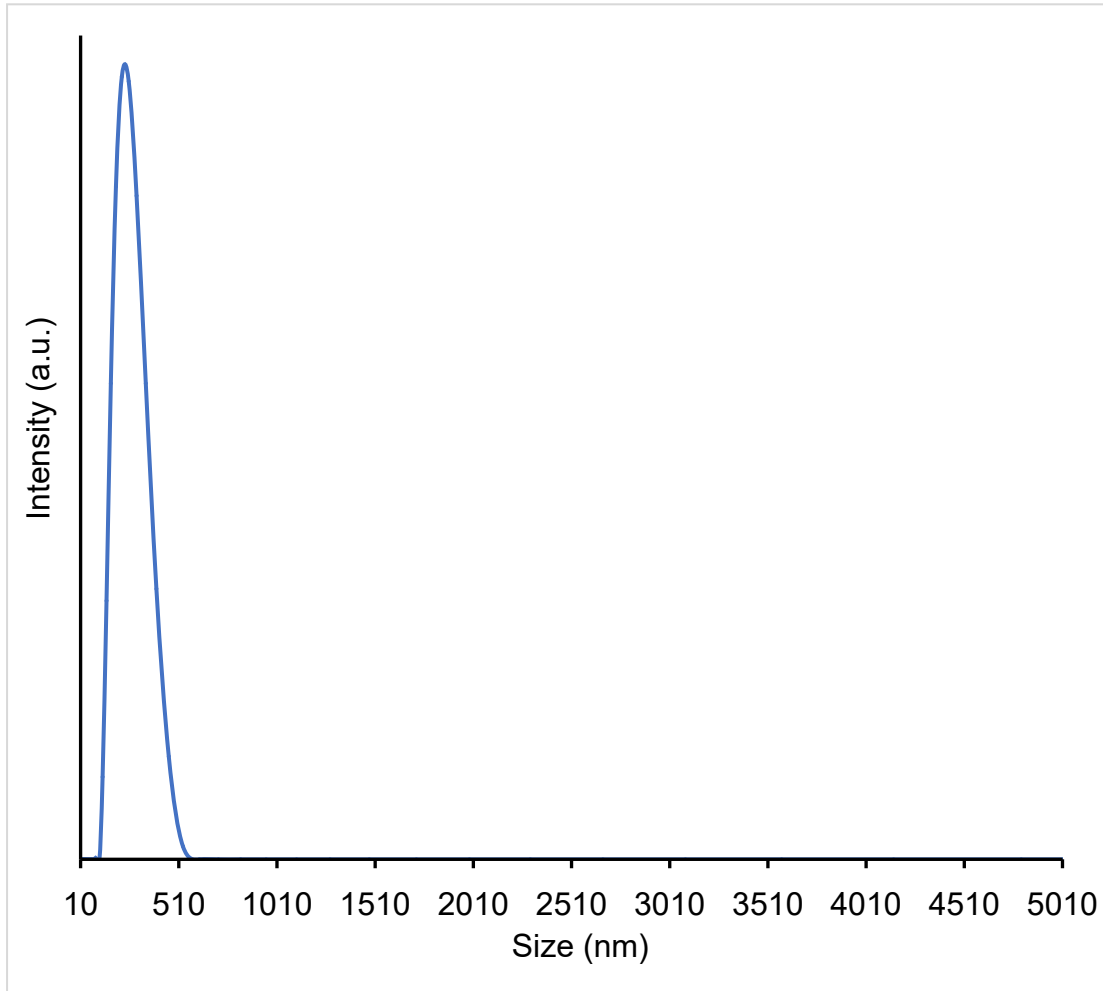

Fig S3: Size characterization of dye-filled liposomes (Lip(Cy7)) through dynamic light scattering (Average: 249.9 nm, PDI: 0.098)

Figure S4

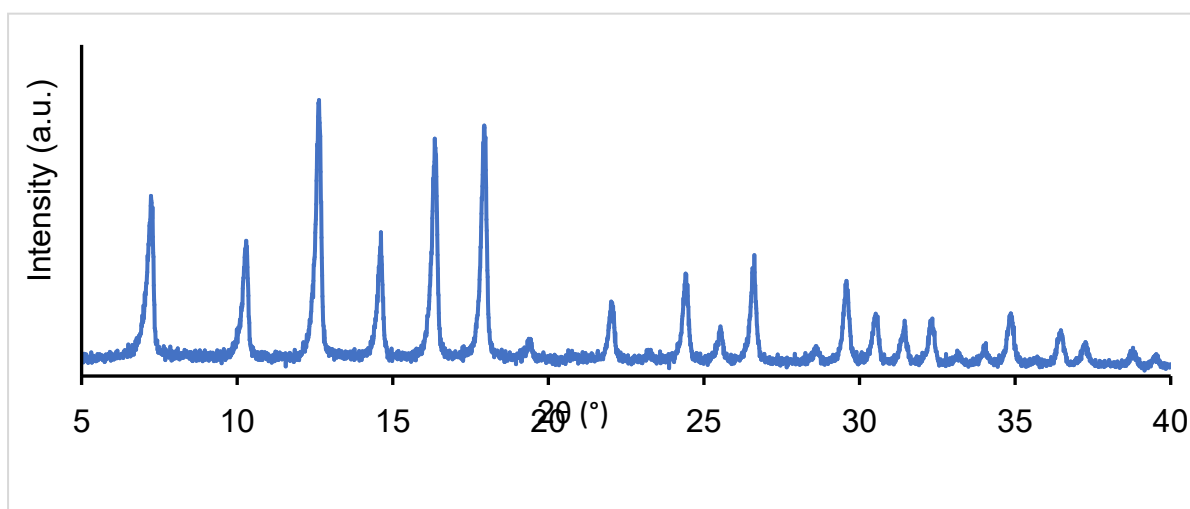

Figure S4: PXRD pattern of Lip(Cy7)@Z

Figure S5

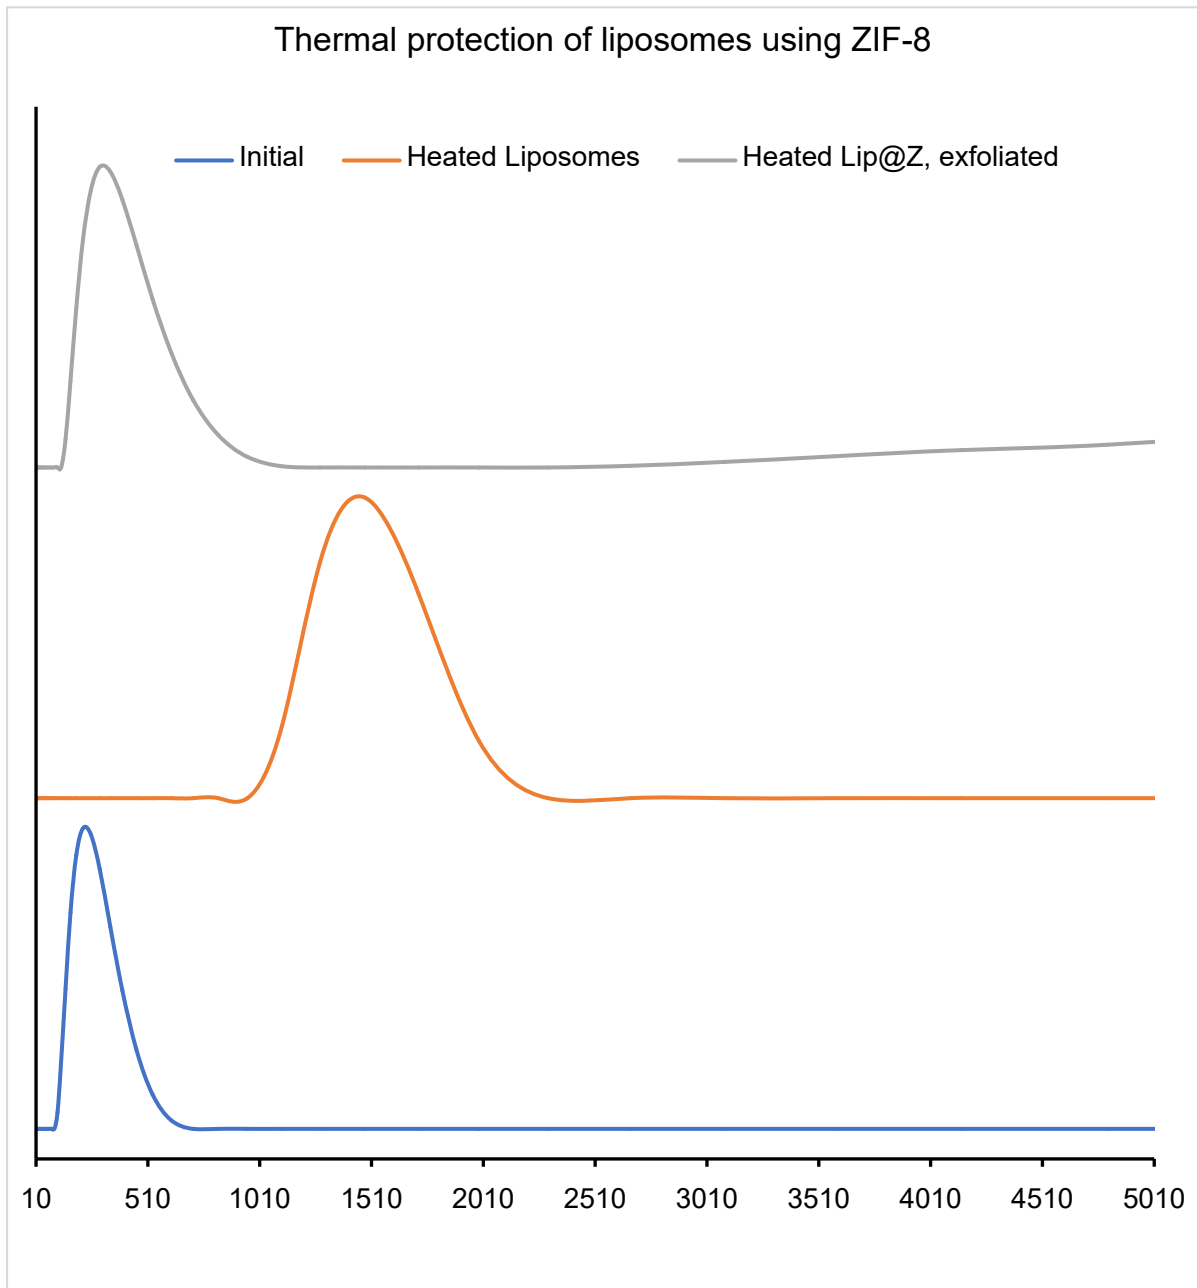

Fig S5: DLS of liposomes before heating (blue), after heating (orange), and after encapsulation in ZIF, heating, and subsequent exfoliation (grey)

Figure S6

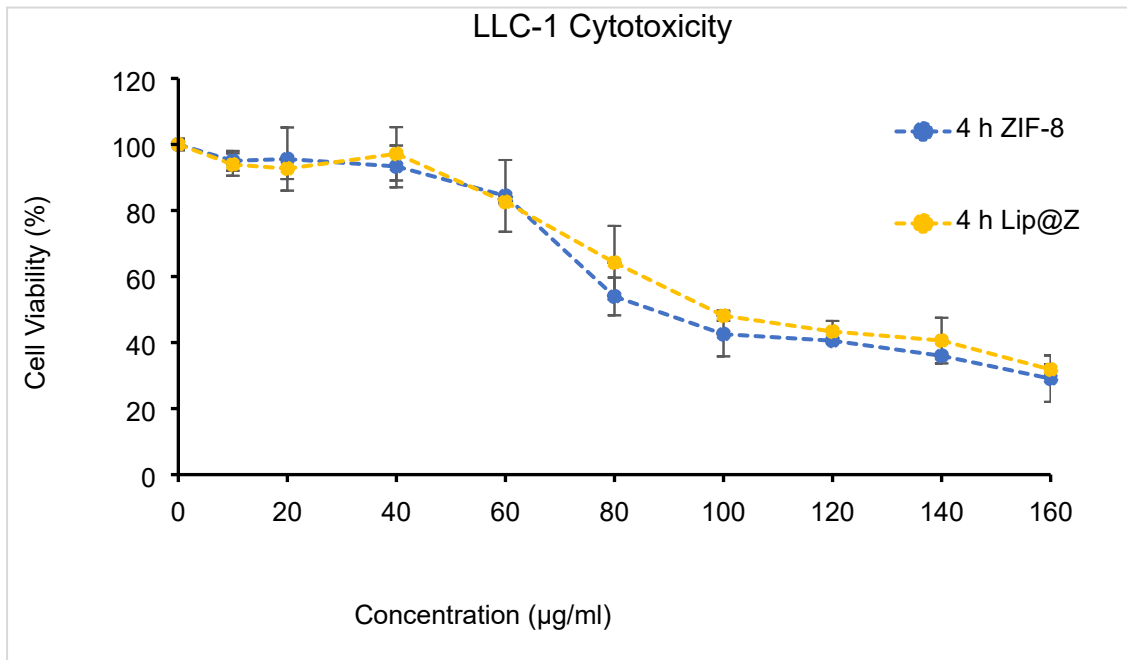

Fig S6: Cytotoxicity studies of ZIF-8 and Lip@Z on LLC-1 model.

Figure S7

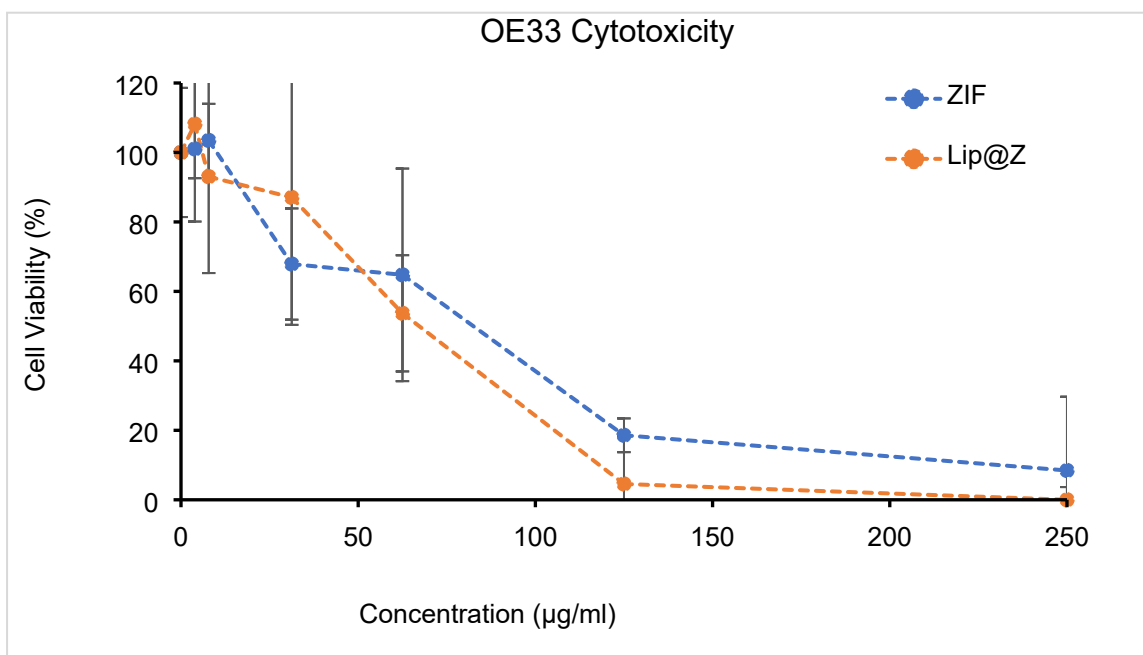

Fig S7: Cytotoxicity studies of ZIF-8 and Lip@Z on OE33 model.

**Figure S8**

| Organ   | Saline group        | ZIF-8 group         |
|---------|---------------------|---------------------|
| Liver   | 429.6902 ± 68.41106 | 406.3947 ± 197.4786 |
| Spleen  | 27.22669 ± 3.758105 | 17.48564 ± 3.534271 |
| Kidneys | 95.28645 ± 3.433586 | 73.00676 ± 20.24546 |
| Lungs   | 33.89019 ± 1.768844 | 34.98579 ± 7.776183 |

Fig S8: Concentration of zinc in the liver, spleen, kidneys, and lungs in parts per billion for both the saline and ZIF-8 groups. N = 3 for each group.

Figure S9

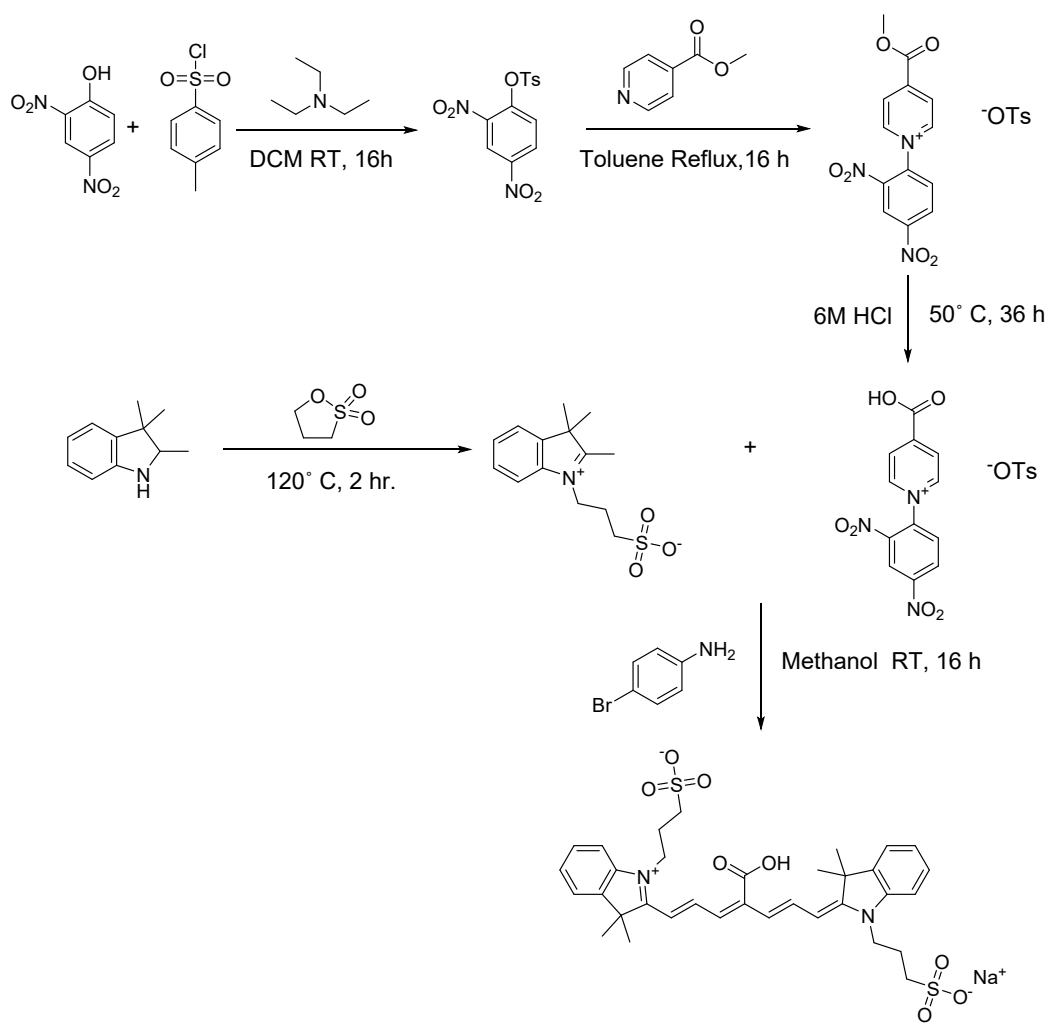

Fig S9: Scheme for synthesis of Cy7 synthesis

Figure S10

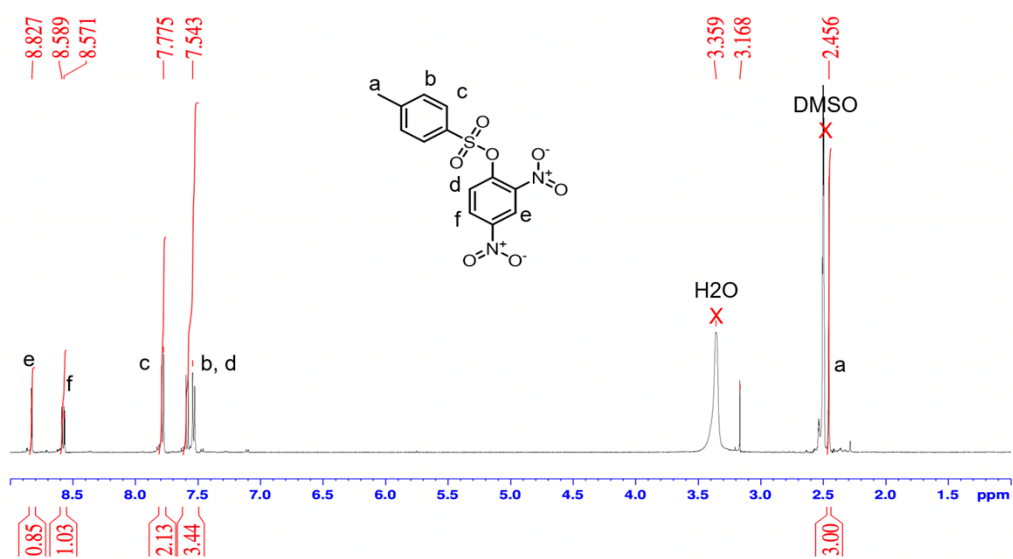

Fig S10: <sup>1</sup>H NMR of 2,4-Dinitrophenyl p-toluenesulfonate



Figure S11

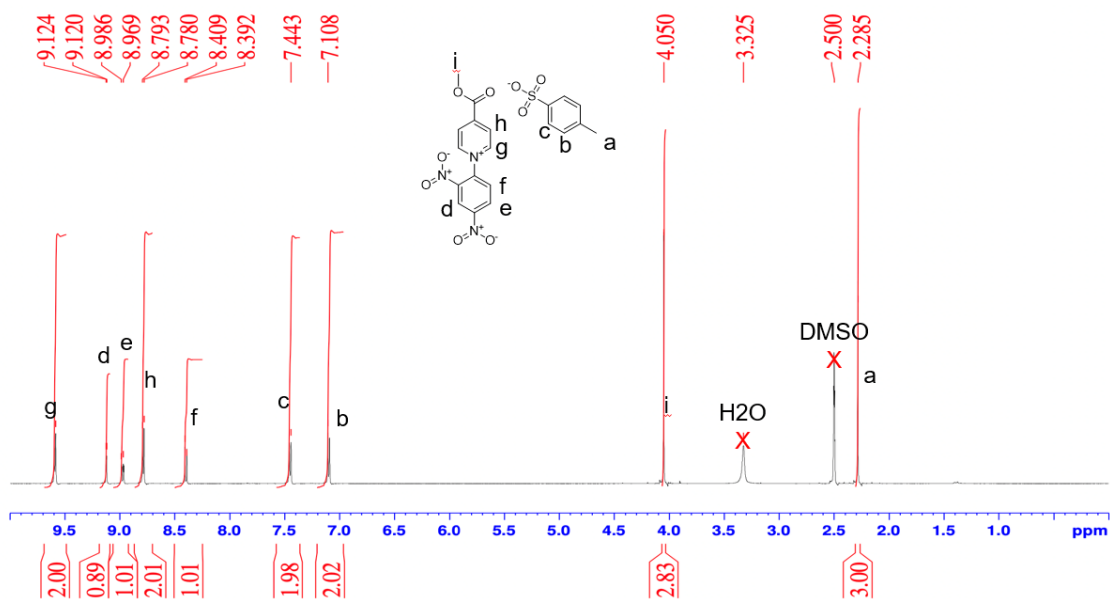

Fig S11: <sup>1</sup>H NMR of 1-(2,4-dinitrophenyl)-4-(methoxycarbonyl)pyridin-1-ium p-toluenesulfonate

Figure S12

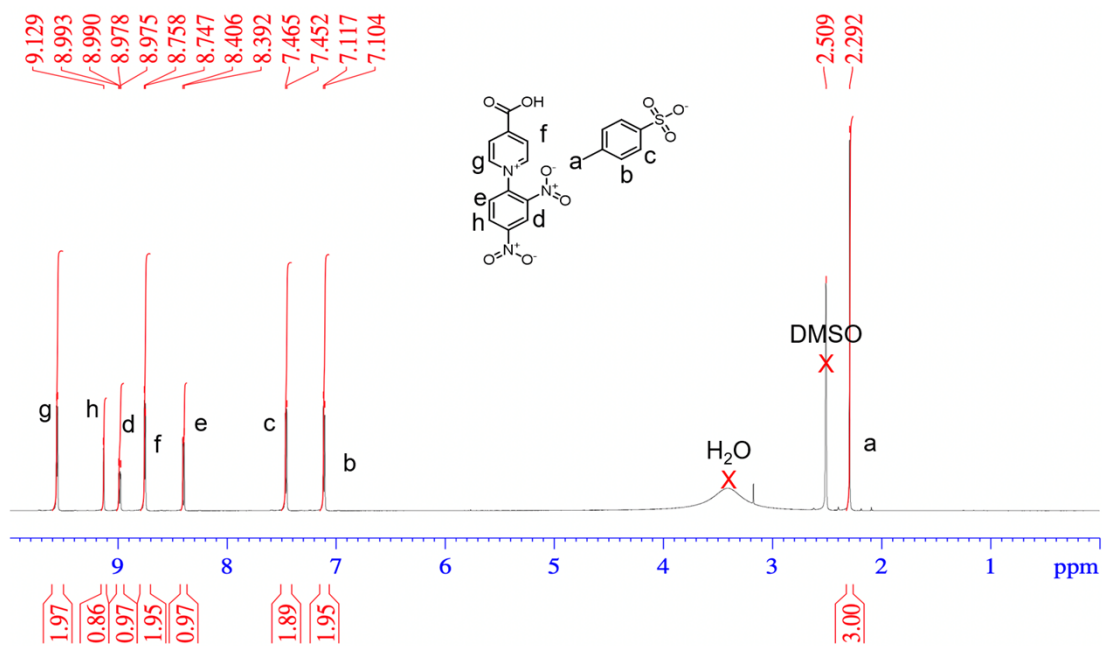

Fig S12: <sup>1</sup>H NMR of 4-carboxy-1-(2,4-dinitrophenyl)pyridin-1-ium p-toluenesulfonate

Figure S13

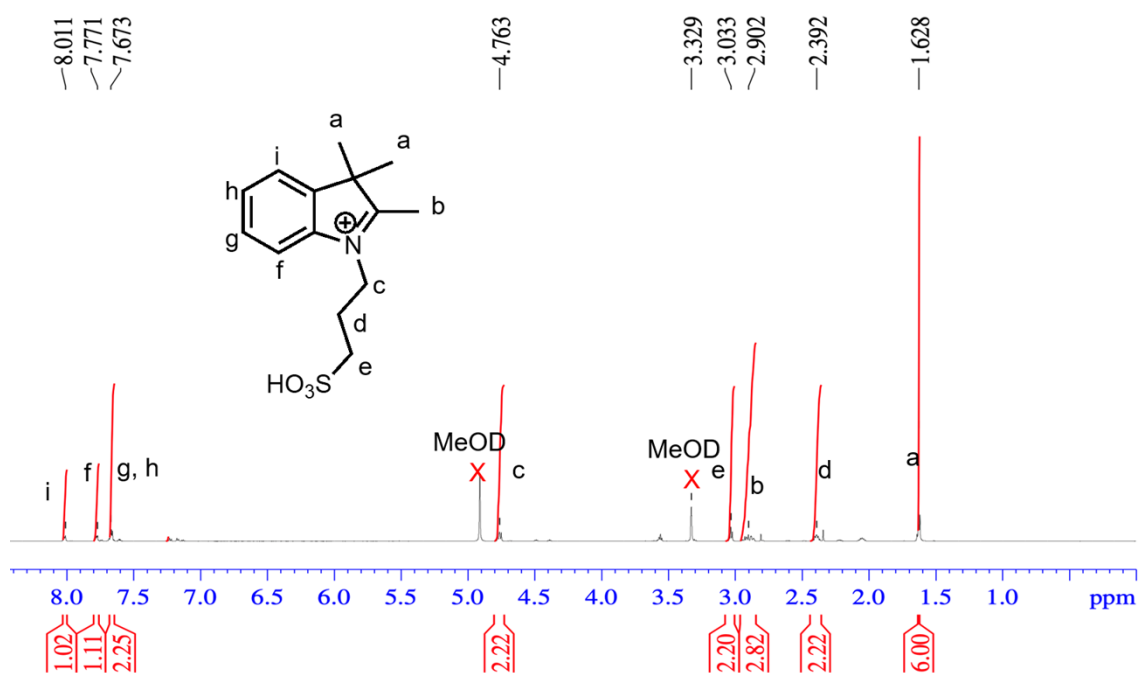

Fig S13: <sup>1</sup>H NMR of 3-(2,3,3-trimethyl-3H-indol-1-ium-1-yl)propane-1-sulfonate

Figure S14

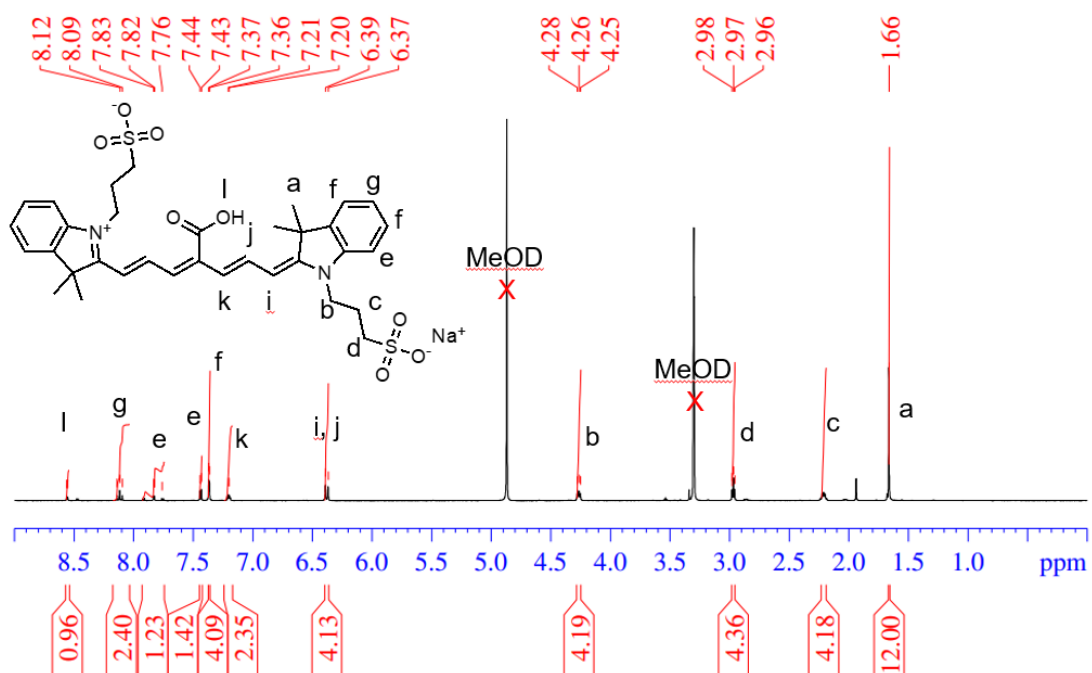

Fig S14: <sup>1</sup>H NMR of sodium 3-(2-((1E,3Z,5E)-4-carboxy-7-((E)-3,3-dimethyl-1-(3-sulfonatopropyl)indolin-2-ylidene)hepta-1,3,5-trien-1-yl)-3,3-dimethyl-3H-indol-1-ium-1-yl)propane-1-sulfonate

Figure S15

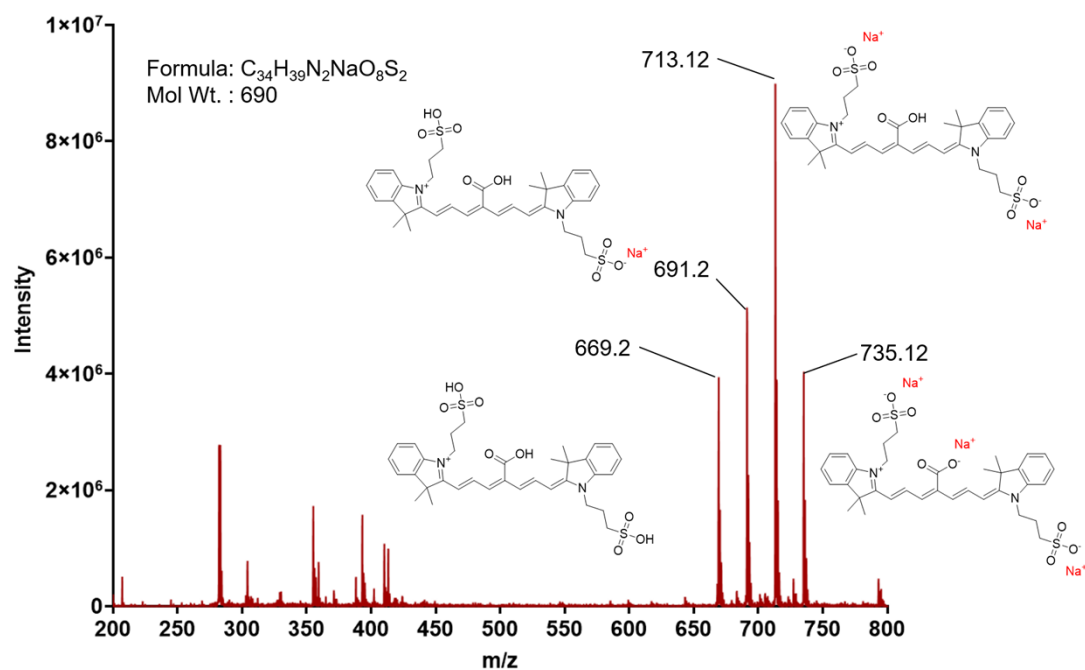

Fig S15: ESI-MS of sodium 3-(2-((1E,3Z,5E)-4-carboxy-7-((E)-3,3-dimethyl-1-(3-sulfonatopropyl)indolin-2-ylidene)hepta-1,3,5-trien-1-yl)-3,3-dimethyl-3H-indol-1-ium-1-yl)propane-1-sulfonate
